# Supplementary material
Source: Springer Nature journal article supplement (https://www.springermedizin.de/resource/supplementary/12916_2012_685_MOESM8_ESM.pdf/9598674)
Supplement: MOESM8 [file 9598674]

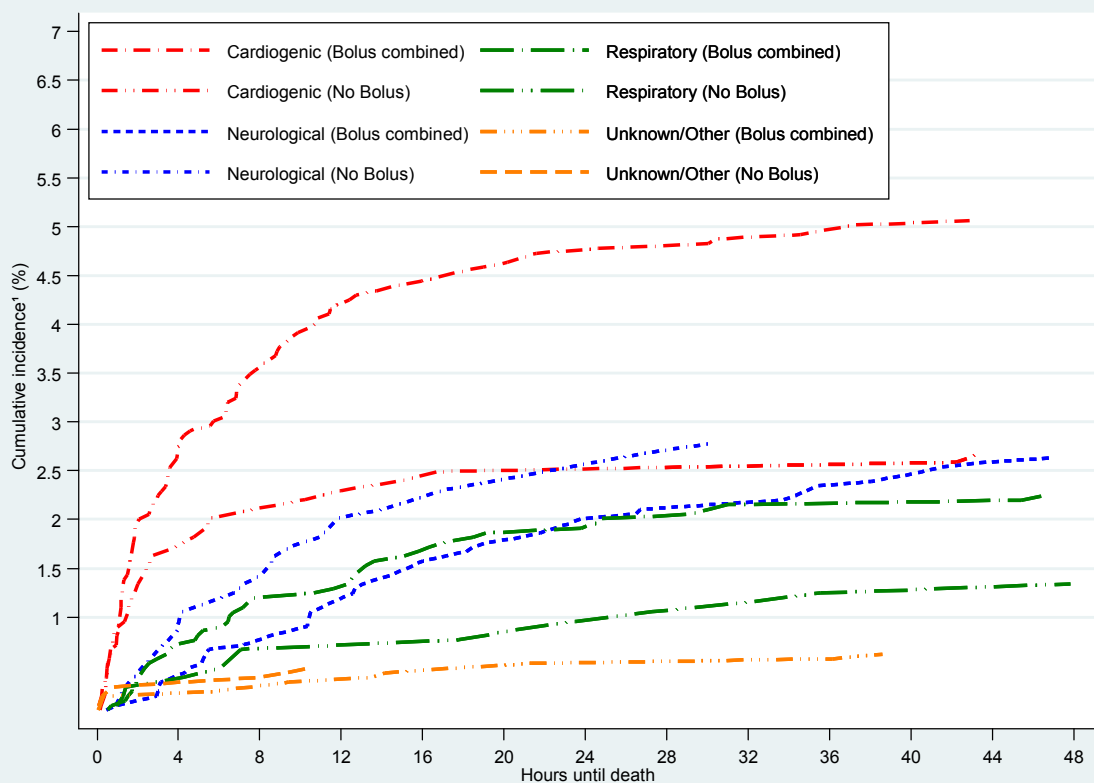

| TCE                                       |            | Randomisation arm |              |                       |           |                               |         |
|-------------------------------------------|------------|-------------------|--------------|-----------------------|-----------|-------------------------------|---------|
|                                           | Total      | Albumin bolus     | Saline bolus | <i>Bolus combined</i> | No bolus  | Sub-hazard ratio <sup>2</sup> | p-value |
| Total enrolled                            | 3141       | 1050              | 1047         | 2097                  | 1044      |                               |         |
| Cardiogenic                               | 123 (3.9%) | 50 (4.8%)         | 46 (4.4%)    | 96 (4.6%)             | 27 (2.6%) | 1.79 (1.17-2.74)              | 0.008   |
| Neurological                              | 63 (2.0%)  | 19 (1.8%)         | 25 (2.3%)    | 44 (2.1%)             | 19 (1.8%) | 1.15 (0.67-1.98)              | 0.61    |
| Respiratory                               | 61 (1.9%)  | 21 (2.0%)         | 26 (2.5%)    | 47 (2.2%)             | 14 (1.3%) | 1.68 (0.93-3.06)              | 0.09    |
| Cardiogenic and Neurological <sup>3</sup> | 11 (0.3%)  | 6 (0.6%)          | 4 (0.4%)     | 10 (0.5%)             | 1 (0.1%)  | 5.00 (0.64-39.04)             | 0.13    |
| Respiratory and Neurological <sup>3</sup> | 21 (0.7%)  | 8 (0.8%)          | 3 (0.3%)     | 11 (0.5%)             | 10 (1.0%) | 0.55 (0.23-1.29)              | 0.17    |
| Unknown/Other                             | 18 (1.7%)  | 7 (0.7%)          | 6 (0.6%)     | 13 (0.6%)             | 5 (0.5%)  | 1.30 (0.46-3.63)              | 0.62    |

<sup>1</sup>Cumulative probability of death from a specific TCE in the presense of other TCE's.

<sup>2</sup>The sub-hazard ratio for bolus combined vs no bolus takes into account the competing risks.

<sup>3</sup>For clarity in the graph, combined TCEs are redistributed so that cardiogenic and neurological are included with cardiogenic alone and neurological and respiratory (largely terminal lung aspiration in a comatosed child) are included with neurological alone.
